# Supplementary material for: MiR-146b-3p regulates proliferation of pancreatic cancer cells with stem cell-like properties by targeting MAP3K10
Source: PubMed Central journal article supplement (PMC8120187; doi:10.7150/jca.48418), 2021-05-03
Supplement: jcav12p3726s1.pdf [file jcav12p3726s1.pdf]

## Supplementary Figures and Tables

### Supplementary Figures:

**Figure S1.** Analysis of the dysregulated genes in TGF- $\beta$  (A) and p53 (B) signaling pathway by the KEGG data base. The dysregulated gene is in red.

**Figure S2.** Detection of the expressions of 16 microRNAs, including 15 microRNA identified by microarray and miR-146b-5p (G), in 12 pairs of pancreatic cancer tissues and matched normal pancreatic tissues by RT-PCR.

**Figure S3.** Detection of the expressions of 16 microRNAs, including 15 microRNA identified by microarray and miR-146b-5p, in five pancreatic cancer cell lines and normal pancreatic tissues by RT-PCR.

**Figure S4.** Over-expression of miR-146b-3p affected cell growth, cell cycle, apoptosis. A) Growth of MIA PaCa-2 and PANC-1 cells was shown after transfection with miR-146b-3p mimic or mimic NC or no transfection. The growth index was assessed at 1, 2, and 3 d by the CSFE assay. B) Over-expression of miR-146b-3p resulted in G1 arrest and S-phase increasing in Mia PaCa-2 and not in BxPC-3 cells as measured by PI staining. C) Apoptosis of MIA PaCa-2 and PANC-1 cells were detected by Annexin V/PI after treatment with miR-146b-3p mimic or mimic NC or no transfection in 72 h. All data are shown as mean  $\pm$  SD. \*, P < 0.05; \*\*, P < 0.01.

Figure S1

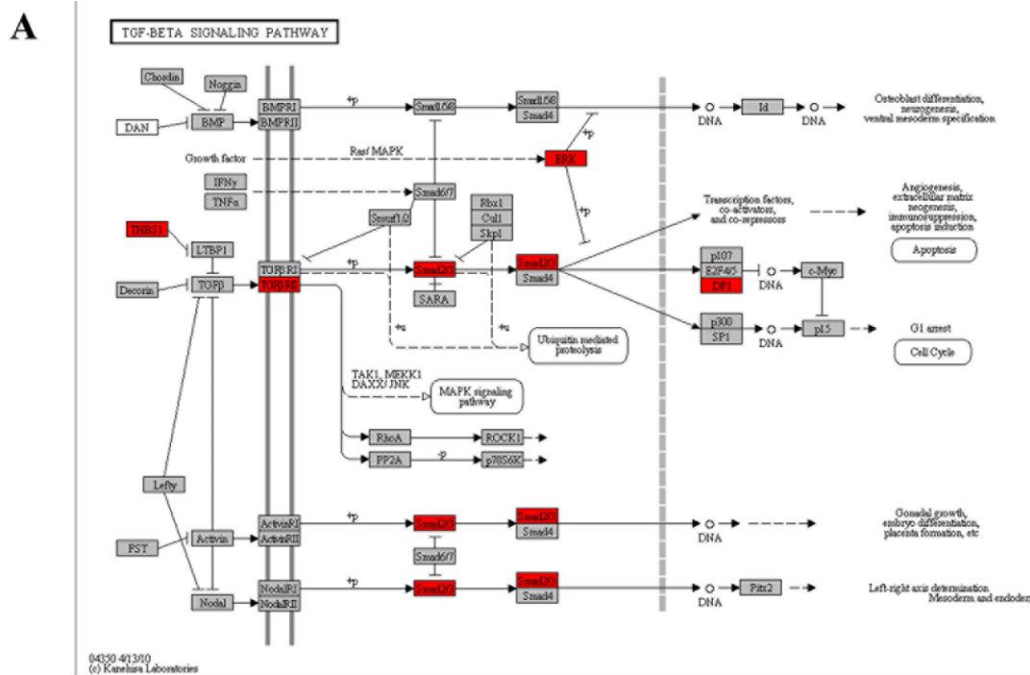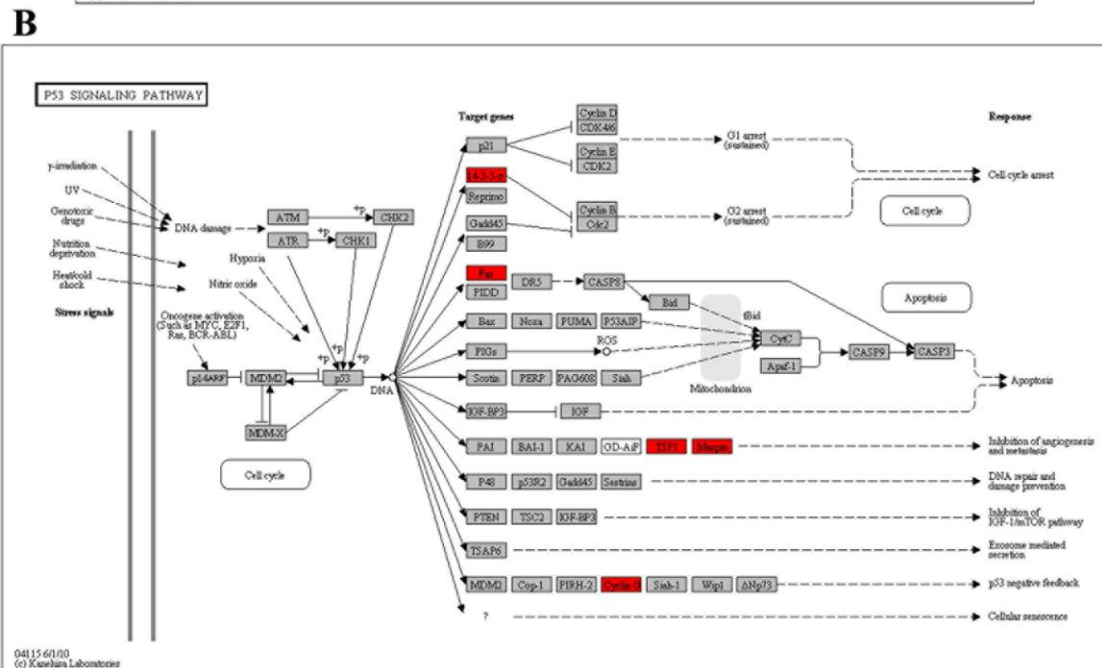

Figure S2

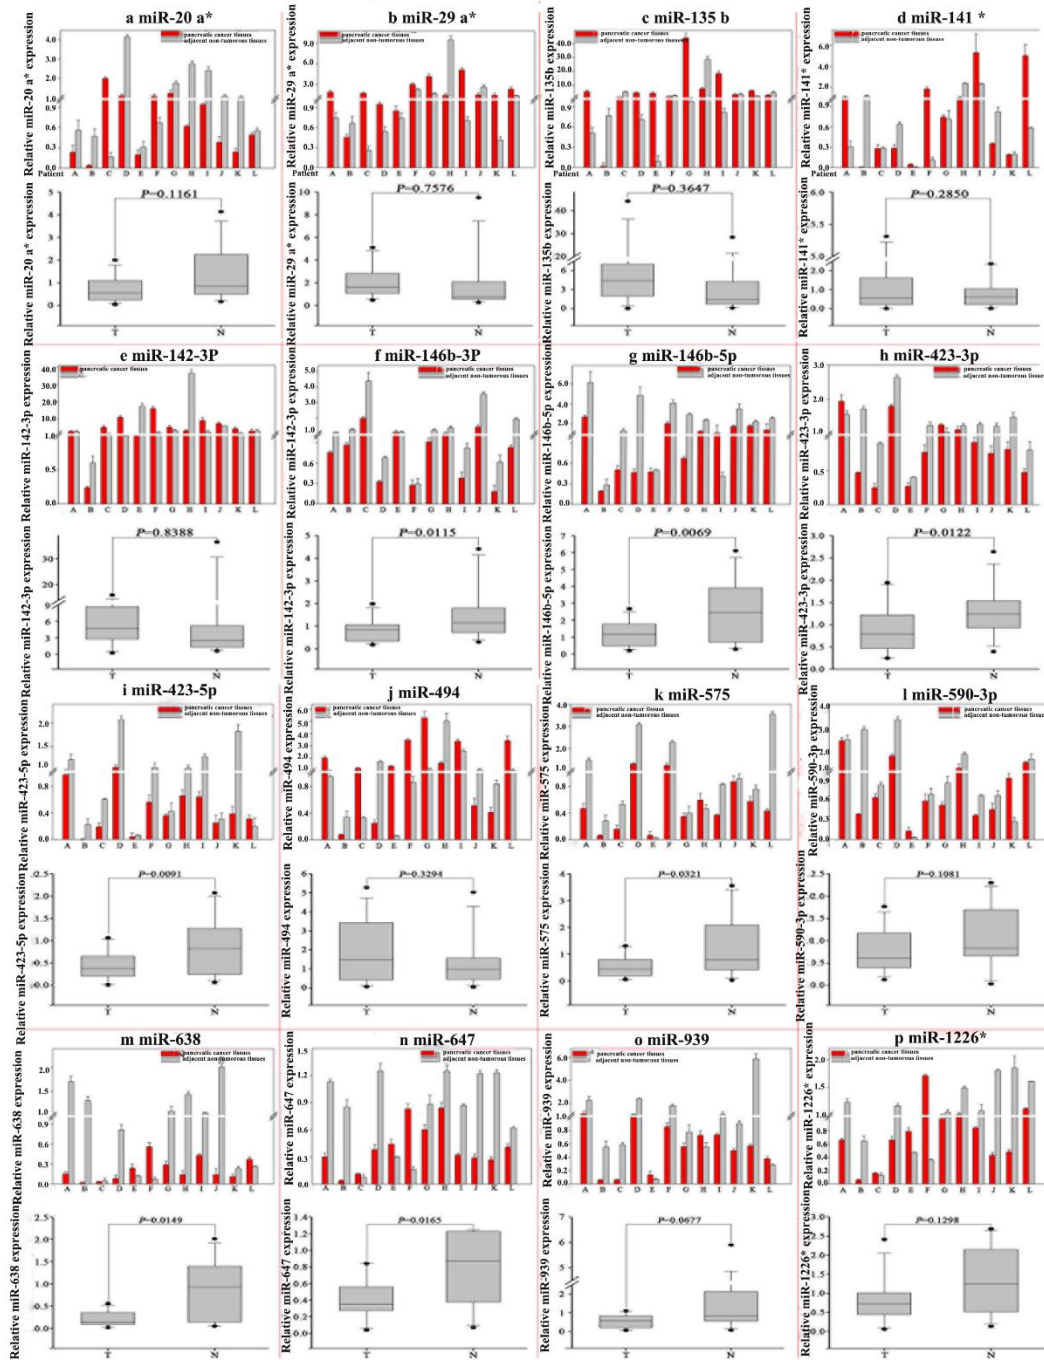

Figure S3

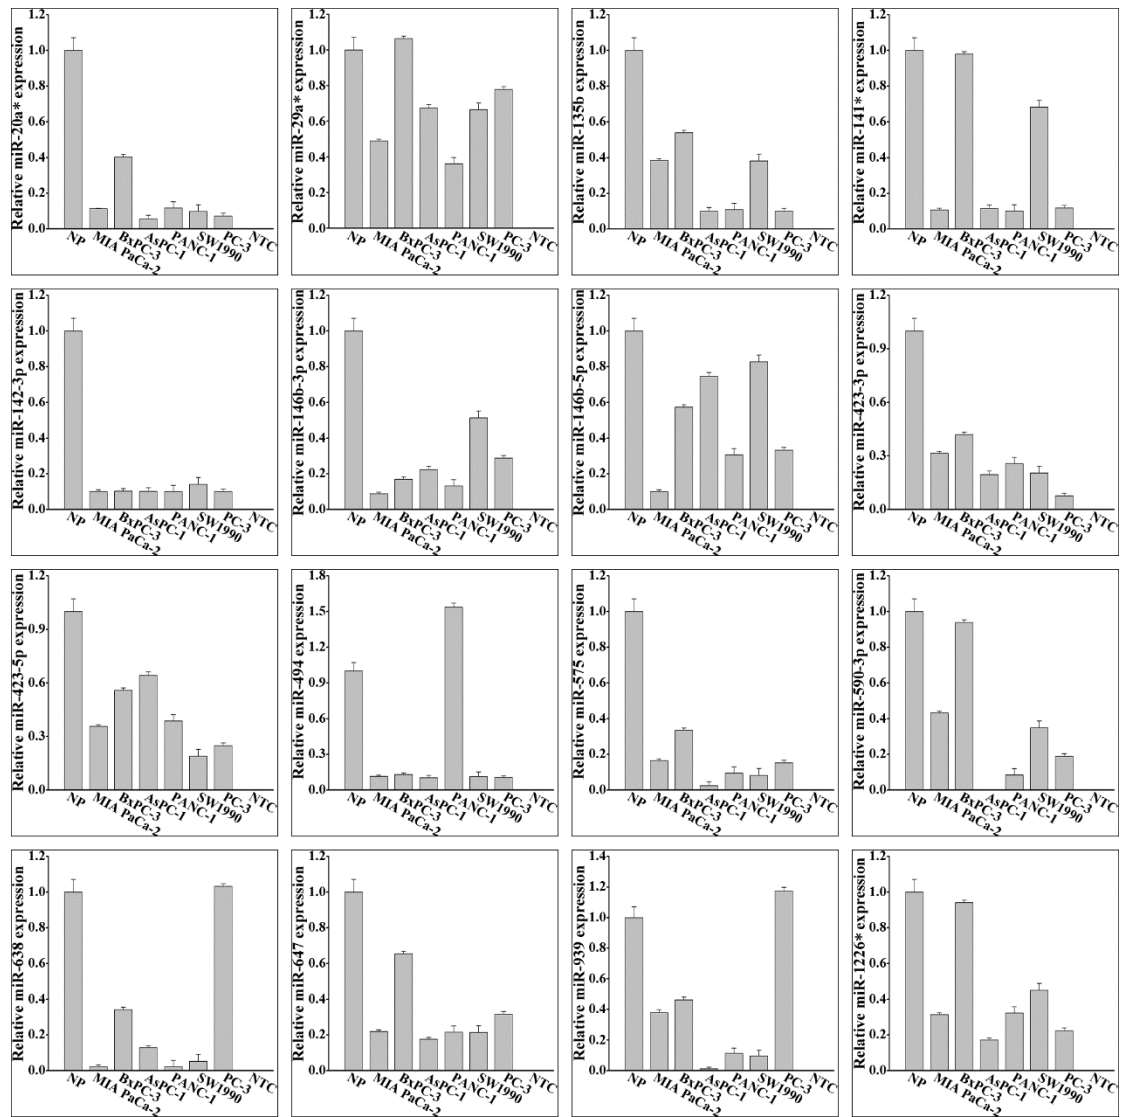

Figure S4

**A**

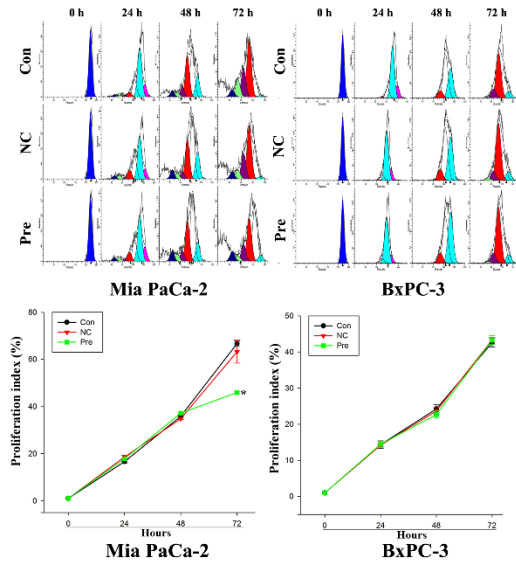

**B**

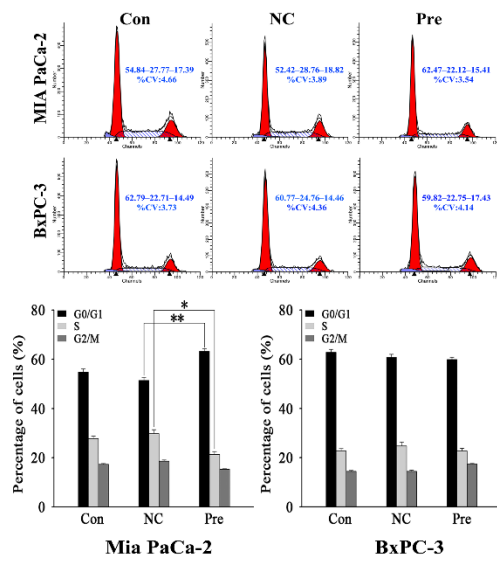

**C**

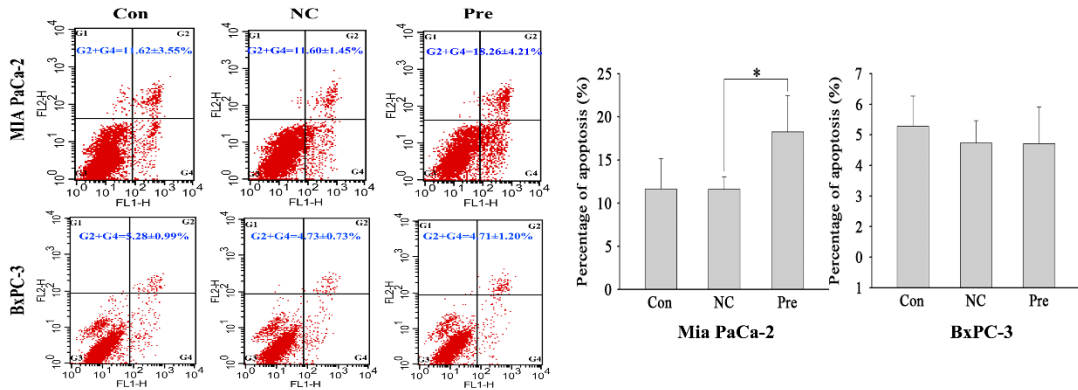

**Supplemental table 1.** antibody used for western blot and Flow cytometry

| <b>Name</b>                                 | <b>company</b>                  | <b>clone No.</b> |
|---------------------------------------------|---------------------------------|------------------|
| Rabbit polyclonal to human DYRK2            | Abcam (Hong Kong)Ltd            | ab37912          |
| Rabbit polyclonal to human MLK2(MAP3K10)    | Abcam (Hong Kong)Ltd            | ab70859          |
| Sheep monoclonal to human GLI-2             | R&D SYSTEMS, Inc                | AF3526           |
| Mouse monoclonal to human cyclin D1         | SANTA CRUZ<br>BIOTECHNOLOGY,INY | sc-8396          |
| Rabbit polyclonal to human Cyclin E1(CCNE1) | ProteinTech Group, Inc          | 11554-1-AP       |
| Mouse monoclonal to human p27               | SANTA CRUZ<br>BIOTECHNOLOGY,INY | sc-1641          |
| Mouse monoclonal to human Bcl-2             | SANTA CRUZ<br>BIOTECHNOLOGY,INY | sc-492           |
| Rabbit monoclonal to human BAX              | SANTA CRUZ<br>BIOTECHNOLOGY,INY | sc-526           |
| Mouse monoclonal to human caspase-3         | SANTA CRUZ<br>BIOTECHNOLOGY,INY | sc-7148          |
| Rabbit polyclonal to human Bcl-xl           | ProteinTech Group, Inc          | 10783-1-AP       |
| Rabbit polyclonal to human caspase-9(CASP9) | ProteinTech Group, Inc          | 10380-1-AP       |
| Rabbit polyclonal to human caspase-8(CASP8) | ProteinTech Group, Inc          | 11554-1-AP       |
| Mouse monoclonal to human $\beta$ -Actin    | SANTA CRUZ<br>BIOTECHNOLOGY,INY | sc-130301        |
|                                             |                                 |                  |
| Mouse monoclonal to human ESA-FITC          | Biomeda                         | B29.1            |
| Goat monoclonal to mouse H2kd-PE            | BD Biosciences PharMingen       | 553566           |
| Mouse monoclonal to human CD24-PE           | BD Biosciences PharMingen       | 555428           |
| Mouse monoclonal to human CD24-FITC         | BD Biosciences PharMingen       | 555427           |
| Mouse monoclonal to human CD44-APC          | BD Biosciences PharMingen       | 559942           |
| Mouse monoclonal to human EpCAM-PerCP-Cy5.5 | BD Biosciences                  | 347199           |

**Supplemental table 2.** Primers and conditions used for RT-PCR and qPCR.

| Gene      | RT-PCR                                                                                                 | qPCR                                     |
|-----------|--------------------------------------------------------------------------------------------------------|------------------------------------------|
| SMAD3     |                                                                                                        | 5'-GTCGGTCAACCAGGGCTTT-3'                |
|           |                                                                                                        | 5'-CCGCTCCCCAGCCTT-3'                    |
| SHH       | 5'-CGCACGGGGACAGCTCGGAAGT-3'                                                                           |                                          |
|           | 5'-CTGCGCGGCCCTCGTAGTGC-3'                                                                             |                                          |
| PTCH      | 5'-GCCGTGCCCCGTGGTCAT-3'                                                                               |                                          |
|           | 5'-CCATTGAGAACGCCGAGGAT-3'                                                                             |                                          |
| SMO       | 5'-GAAGTGCCCTTGGTTCGGACA-3'                                                                            |                                          |
|           | 5'-CCGCCAGTCAGCCACGAAT-3'                                                                              |                                          |
| MAP3K10   |                                                                                                        | 5'-ACGGAATTCATGGAGGAGGAGGGGGCGGTGG-3'    |
|           |                                                                                                        | 5'-ACGCTCGAGTTAGTGGGAGCCGTGGGCCCCGCAC-3' |
| DYRK2     |                                                                                                        | 5'-GCCATGTTAACCAGGAAACC-3'               |
|           |                                                                                                        | 5'-GAAGCTGAAGCTGACGAAC-3'                |
| GLI1      | 5'-CAGGGAGTGCAGCCAATACAG-3'                                                                            |                                          |
|           | 5'-GAGCGGCGGCTGACAGTATA-3'                                                                             |                                          |
| GLI2      | 5'-AGAAGCAGCGCAATGACGTG-3'                                                                             | 5'-TGGCCGCTTCAGATGACAGATGTTG-3'          |
|           | 5'-GTCATCCAGTGCCGTCAGGT-3'                                                                             | 5'-CGTTAGCCGAATGTCAGCCGTGAAG-3'          |
| GAPDH     |                                                                                                        | 5'-GGGTGTGAACCATGAGAAGT-3'               |
|           |                                                                                                        | 5' -GGCATGGAC TGTGGTCATGA-3'             |
|           |                                                                                                        |                                          |
| MAP3K10   | 5'-GATCGCCGTGTAAT <b><i>TCTAGAGGCCTGCCACCACC</i></b> -3' (XbaI sites are in bold and italic)           |                                          |
| 3'UTR     | 5'- CCGGCCGCCCCGACT <b><i>TCTAGA</i></b> AAGGGGGCAGGGGTTACC- 3'                                        |                                          |
| MAP3K10   | 5'- GATCGCCGTGTAAT <b><i>TCTAGAGGCCTGCCACCACC</i></b> GCCCGCCTG-3' (XbaI sites are in bold and italic) |                                          |
| 3'UTR-mut | 5'- CCGGCCGCCCCGACT <b><i>TCTAGA</i></b> AAGGGGGCAGGGGTTACCTTAAATGCTCCATTTGTGCC - 3'                   |                                          |

**Supplemental table 3.** Go analysis of the dysregulated genes identified by microarray

| go_id                     | go_name                       | pvalue    | FDR      | enrichment | go_diff    |               |
|---------------------------|-------------------------------|-----------|----------|------------|------------|---------------|
|                           |                               |           |          |            | gene_count | go_gene_count |
| <b>genes up-regulated</b> |                               |           |          |            |            |               |
| GO:0007049                | cell cycle                    | 0.0001123 | 0.009321 | 2.528747   | 23         | 769           |
|                           | ubiquitin-dependent protein   |           |          |            |            |               |
| GO:0006511                | catabolic process             | 0.0001495 | 0.010055 | 2.774463   | 19         | 579           |
| GO:0042981                | regulation of apoptosis       | 0.0001864 | 0.010552 | 4.973419   | 9          | 153           |
| GO:0006512                | ubiquitin cycle               | 0.0001866 | 0.010554 | 2.927328   | 17         | 491           |
|                           | protein amino acid            |           |          |            |            |               |
| GO:0006468                | phosphorylation               | 0.0003047 | 0.011684 | 2.418802   | 22         | 769           |
| GO:0006897                | endocytosis                   | 0.0003786 | 0.012084 | 4.529363   | 9          | 168           |
| GO:0030155                | regulation of cell adhesion   | 0.0004015 | 0.012181 | 13.5277    | 4          | 25            |
| GO:0016477                | cell migration                | 0.0004287 | 0.012286 | 7.045676   | 6          | 72            |
| GO:0001666                | response to hypoxia           | 0.0004353 | 0.01231  | 5.802322   | 7          | 102           |
| GO:0015718                | monocarboxylic acid transport | 0.0005056 | 0.012997 | 23.05858   | 3          | 11            |
|                           | prostaglandin metabolic       |           |          |            |            |               |
| GO:0006693                | process                       | 0.0008611 | 0.020164 | 19.5111    | 3          | 13            |
| GO:0060056                | mammary gland involution      | 0.001649  | 0.032253 | 42.27406   | 2          | 4             |
| GO:0030216                | keratinocyte differentiation  | 0.002075  | 0.037264 | 8.899802   | 4          | 38            |
| GO:0007050                | cell cycle arrest             | 0.0022418 | 0.03901  | 4.416693   | 7          | 134           |
|                           | rhodopsin mediated signaling  |           |          |            |            |               |
| GO:0016056                | pathway                       | 0.0027269 | 0.043522 | 33.81925   | 2          | 5             |
| GO:0006915                | apoptosis                     | 0.002863  | 0.044657 | 2.179667   | 19         | 737           |
| GO:0007067                | mitosis                       | 0.0030692 | 0.046282 | 3.131412   | 10         | 270           |
| GO:0009306                | protein secretion             | 0.0032274 | 0.047457 | 12.68222   | 3          | 20            |
| GO:0006869                | lipid transport               | 0.0040363 | 0.052654 | 4.611715   | 6          | 110           |
| GO:0030147                | natriuresis                   | 0.0040583 | 0.052779 | 28.18271   | 2          | 6             |
|                           | transforming growth factor    |           |          |            |            |               |
|                           | beta receptor signaling       |           |          |            |            |               |
| GO:0007179                | pathway                       | 0.0049849 | 0.057429 | 7.045676   | 4          | 48            |
|                           | negative regulation of blood  |           |          |            |            |               |
| GO:0030195                | coagulation                   | 0.0056371 | 0.060113 | 24.1566    | 2          | 7             |
| GO:0008544                | epidermis development         | 0.0057399 | 0.0605   | 4.299057   | 6          | 118           |
| GO:0001558                | regulation of cell growth     | 0.0075169 | 0.066009 | 3.565282   | 7          | 166           |
| GO:0000278                | mitotic cell cycle            | 0.0095133 | 0.070351 | 18.78847   | 2          | 9             |
|                           | induction of apoptosis by     |           |          |            |            |               |
| GO:0008631                | oxidative stress              | 0.0095133 | 0.070351 | 18.78847   | 2          | 9             |
| GO:0051899                | membrane depolarization       | 0.0095133 | 0.070351 | 18.78847   | 2          | 9             |
| GO:0009790                | embryonic development         | 0.0099092 | 0.071054 | 5.830905   | 4          | 58            |
| GO:0015711                | organic anion transport       | 0.0115592 | 0.073577 | 8.182076   | 3          | 31            |
| GO:0019835                | cytolysis                     | 0.0115592 | 0.073577 | 8.182076   | 3          | 31            |
| GO:0030146                | diuresis                      | 0.0117989 | 0.073897 | 16.90962   | 2          | 10            |



|            |                                  |           |          |          |    |     |
|------------|----------------------------------|-----------|----------|----------|----|-----|
| GO:0000209 | protein polyubiquitination       | 0.0126443 | 0.074948 | 7.926386 | 3  | 32  |
|            | positive regulation of           |           |          |          |    |     |
| GO:0045766 | angiogenesis                     | 0.0126443 | 0.074948 | 7.926386 | 3  | 32  |
| GO:0006886 | intracellular protein transport  | 0.0139004 | 0.076317 | 2.688809 | 9  | 283 |
| GO:0000165 | MAPKKK cascade                   | 0.0162552 | 0.078406 | 7.246981 | 3  | 35  |
| GO:0042632 | cholesterol homeostasis          | 0.0162552 | 0.078406 | 7.246981 | 3  | 35  |
|            | actin polymerization or          |           |          |          |    |     |
| GO:0008154 | depolymerization                 | 0.0170365 | 0.078991 | 14.09135 | 2  | 12  |
|            | regulation of embryonic          |           |          |          |    |     |
| GO:0045995 | development                      | 0.0170365 | 0.078991 | 14.09135 | 2  | 12  |
| GO:0006631 | fatty acid metabolic process     | 0.01799   | 0.079647 | 3.950847 | 5  | 107 |
|            | positive regulation of activated |           |          |          |    |     |
| GO:0042104 | T cell proliferation             | 0.0199775 | 0.080839 | 13.0074  | 2  | 13  |
| GO:0042311 | vasodilation                     | 0.0199775 | 0.080839 | 13.0074  | 2  | 13  |
|            | maintenance of protein           |           |          |          |    |     |
| GO:0051457 | location in nucleus              | 0.0199775 | 0.080839 | 13.0074  | 2  | 13  |
| GO:0007585 | respiratory gaseous exchange     | 0.0204131 | 0.081074 | 6.674851 | 3  | 38  |
|            | negative regulation of cell      |           |          |          |    |     |
| GO:0030308 | growth                           | 0.0208795 | 0.081315 | 3.808474 | 5  | 111 |
| GO:0006916 | anti-apoptosis                   | 0.0210021 | 0.081377 | 2.694761 | 8  | 251 |
|            | carbohydrate metabolic           |           |          |          |    |     |
| GO:0005975 | process                          | 0.0225325 | 0.082101 | 2.348559 | 10 | 360 |
| GO:0001569 | patterning of blood vessels      | 0.023126  | 0.082359 | 12.0783  | 2  | 14  |
|            | protein amino acid               |           |          |          |    |     |
| GO:0006479 | methylation                      | 0.023126  | 0.082359 | 12.0783  | 2  | 14  |
| GO:0030301 | cholesterol transport            | 0.023126  | 0.082359 | 12.0783  | 2  | 14  |
|            | optic cup morphogenesis          |           |          |          |    |     |
| GO:0002072 | involved in camera-type eye      | 0.0236552 | 0.082579 | 84.54812 | 1  | 1   |
|            | development                      |           |          |          |    |     |
|            | myeloid progenitor cell          |           |          |          |    |     |
| GO:0002318 | differentiation                  | 0.0236552 | 0.082579 | 84.54812 | 1  | 1   |
|            | peptide antigen assembly with    |           |          |          |    |     |
| GO:0002502 | MHC class I protein complex      | 0.0236552 | 0.082579 | 84.54812 | 1  | 1   |
|            | positive regulation of           |           |          |          |    |     |
|            | tolerance induction to self      |           |          |          |    |     |
| GO:0002651 | antigen                          | 0.0236552 | 0.082579 | 84.54812 | 1  | 1   |
|            | positive regulation of B cell    |           |          |          |    |     |
| GO:0002663 | tolerance induction              | 0.0236552 | 0.082579 | 84.54812 | 1  | 1   |
|            | positive regulation of T cell    |           |          |          |    |     |
| GO:0002666 | tolerance induction              | 0.0236552 | 0.082579 | 84.54812 | 1  | 1   |
|            | positive regulation of immune    |           |          |          |    |     |
| GO:0002684 | system process                   | 0.0236552 | 0.082579 | 84.54812 | 1  | 1   |
|            | galactosylceramide catabolic     |           |          |          |    |     |
| GO:0006683 | process                          | 0.0236552 | 0.082579 | 84.54812 | 1  | 1   |

|            |                                                                                                   |           |          |          |    |     |
|------------|---------------------------------------------------------------------------------------------------|-----------|----------|----------|----|-----|
| GO:0007559 | histolysis<br>gamma-aminobutyric acid                                                             | 0.0236552 | 0.082579 | 84.54812 | 1  | 1   |
| GO:0009448 | metabolic process                                                                                 | 0.0236552 | 0.082579 | 84.54812 | 1  | 1   |
| GO:0019372 | lipoxygenase pathway                                                                              | 0.0236552 | 0.082579 | 84.54812 | 1  | 1   |
| GO:0019377 | glycolipid catabolic process<br>nucleus accumbens                                                 | 0.0236552 | 0.082579 | 84.54812 | 1  | 1   |
| GO:0021768 | development                                                                                       | 0.0236552 | 0.082579 | 84.54812 | 1  | 1   |
| GO:0030003 | cellular cation homeostasis<br>regulation of tissue                                               | 0.0236552 | 0.082579 | 84.54812 | 1  | 1   |
| GO:0034103 | remodeling<br>microtubule anchoring at                                                            | 0.0236552 | 0.082579 | 84.54812 | 1  | 1   |
| GO:0034454 | centrosome<br>chemokine biosynthetic                                                              | 0.0236552 | 0.082579 | 84.54812 | 1  | 1   |
| GO:0042033 | process<br>interleukin-2 biosynthetic                                                             | 0.0236552 | 0.082579 | 84.54812 | 1  | 1   |
| GO:0042094 | process<br>interleukin-13 biosynthetic                                                            | 0.0236552 | 0.082579 | 84.54812 | 1  | 1   |
| GO:0042231 | process<br>granulocyte macrophage<br>colony-stimulating factor                                    | 0.0236552 | 0.082579 | 84.54812 | 1  | 1   |
| GO:0042253 | biosynthetic process                                                                              | 0.0236552 | 0.082579 | 84.54812 | 1  | 1   |
| GO:0042313 | protein kinase C deactivation<br>negative regulation of amyloid<br>precursor protein biosynthetic | 0.0236552 | 0.082579 | 84.54812 | 1  | 1   |
| GO:0042985 | process                                                                                           | 0.0236552 | 0.082579 | 84.54812 | 1  | 1   |
| GO:0043179 | rhythmic excitation                                                                               | 0.0236552 | 0.082579 | 84.54812 | 1  | 1   |
| GO:0045603 | positive regulation of<br>endothelial cell differentiation                                        | 0.0236552 | 0.082579 | 84.54812 | 1  | 1   |
| GO:0045616 | regulation of keratinocyte<br>differentiation                                                     | 0.0236552 | 0.082579 | 84.54812 | 1  | 1   |
| GO:0046713 | boron transport                                                                                   | 0.0236552 | 0.082579 | 84.54812 | 1  | 1   |
| GO:0048701 | embryonic cranial skeleton<br>morphogenesis                                                       | 0.0236552 | 0.082579 | 84.54812 | 1  | 1   |
| GO:0051771 | negative regulation of nitric-<br>oxide synthase biosynthetic<br>process                          | 0.0236552 | 0.082579 | 84.54812 | 1  | 1   |
| GO:0060166 | olfactory pit development                                                                         | 0.0236552 | 0.082579 | 84.54812 | 1  | 1   |
| GO:0016192 | vesicle-mediated transport                                                                        | 0.0255373 | 0.084476 | 2.601481 | 8  | 260 |
| GO:0007420 | brain development                                                                                 | 0.0294558 | 0.087849 | 3.493724 | 5  | 121 |
| GO:0048205 | COPI coating of Golgi vesicle<br>negative regulation of protein                                   | 0.0300247 | 0.088285 | 10.56851 | 2  | 16  |
| GO:0006469 | kinase activity                                                                                   | 0.034276  | 0.091186 | 5.514008 | 3  | 46  |
| GO:0008643 | carbohydrate transport                                                                            | 0.034276  | 0.091186 | 5.514008 | 3  | 46  |
| GO:0006629 | lipid metabolic process                                                                           | 0.0347319 | 0.091465 | 2.099389 | 11 | 443 |

|            |                                                                                                         |           |          |          |    |     |
|------------|---------------------------------------------------------------------------------------------------------|-----------|----------|----------|----|-----|
| GO:0009615 | response to virus                                                                                       | 0.0355927 | 0.091976 | 3.328666 | 5  | 127 |
| GO:0007155 | cell adhesion                                                                                           | 0.0358377 | 0.092118 | 1.767919 | 17 | 813 |
| GO:0006183 | GTP biosynthetic process                                                                                | 0.0376911 | 0.093146 | 9.394235 | 2  | 18  |
| GO:0006228 | UTP biosynthetic process                                                                                | 0.0376911 | 0.093146 | 9.394235 | 2  | 18  |
| GO:0032526 | response to retinoic acid<br>integrin-mediated signaling<br>pathway                                     | 0.0376911 | 0.093146 | 9.394235 | 2  | 18  |
| GO:0007229 | pathway                                                                                                 | 0.038366  | 0.0935   | 3.932471 | 4  | 86  |
| GO:0019722 | calcium-mediated signaling                                                                              | 0.0383861 | 0.093511 | 5.284257 | 3  | 48  |
| GO:0006461 | protein complex assembly<br>small GTPase mediated signal<br>transduction                                | 0.0384238 | 0.09353  | 2.866038 | 6  | 177 |
| GO:0007264 | transduction                                                                                            | 0.0395405 | 0.094095 | 2.257962 | 9  | 337 |
| GO:0016337 | cell-cell adhesion                                                                                      | 0.0413694 | 0.094967 | 3.843096 | 4  | 88  |
| GO:0006241 | CTP biosynthetic process                                                                                | 0.0417997 | 0.095163 | 8.899802 | 2  | 19  |
| GO:0006509 | membrane protein ectodomain<br>proteolysis                                                              | 0.0417997 | 0.095163 | 8.899802 | 2  | 19  |
| GO:0016051 | carbohydrate biosynthetic<br>process                                                                    | 0.0417997 | 0.095163 | 8.899802 | 2  | 19  |
| GO:0018105 | peptidyl-serine<br>phosphorylation                                                                      | 0.0417997 | 0.095163 | 8.899802 | 2  | 19  |
| GO:0055085 | transmembrane transport                                                                                 | 0.0417997 | 0.095163 | 8.899802 | 2  | 19  |
| GO:0030163 | protein catabolic process<br>positive regulation of MAP<br>kinase activity                              | 0.0450398 | 0.096543 | 4.973419 | 3  | 51  |
| GO:0043406 | kinase activity                                                                                         | 0.0460855 | 0.096954 | 8.454812 | 2  | 20  |
| GO:0050880 | regulation of blood vessel size                                                                         | 0.0460855 | 0.096954 | 8.454812 | 2  | 20  |
| GO:0001519 | peptide amidation                                                                                       | 0.0470311 | 0.097313 | 42.27406 | 1  | 2   |
| GO:0001887 | selenium metabolic process                                                                              | 0.0470311 | 0.097313 | 42.27406 | 1  | 2   |
| GO:0002376 | immune system process                                                                                   | 0.0470311 | 0.097313 | 42.27406 | 1  | 2   |
| GO:0006543 | glutamine catabolic process                                                                             | 0.0470311 | 0.097313 | 42.27406 | 1  | 2   |
| GO:0007136 | meiotic prophase II                                                                                     | 0.0470311 | 0.097313 | 42.27406 | 1  | 2   |
| GO:0007620 | copulation                                                                                              | 0.0470311 | 0.097313 | 42.27406 | 1  | 2   |
| GO:0009313 | oligosaccharide catabolic<br>process                                                                    | 0.0470311 | 0.097313 | 42.27406 | 1  | 2   |
| GO:0009450 | gamma-aminobutyric acid<br>catabolic process                                                            | 0.0470311 | 0.097313 | 42.27406 | 1  | 2   |
| GO:0015727 | lactate transport                                                                                       | 0.0470311 | 0.097313 | 42.27406 | 1  | 2   |
| GO:0017187 | peptidyl-glutamic acid<br>carboxylation                                                                 | 0.0470311 | 0.097313 | 42.27406 | 1  | 2   |
| GO:0019049 | evasion of host defenses by<br>virus                                                                    | 0.0470311 | 0.097313 | 42.27406 | 1  | 2   |
| GO:0019858 | cytosine metabolic process                                                                              | 0.0470311 | 0.097313 | 42.27406 | 1  | 2   |
| GO:0020027 | hemoglobin metabolic process<br>negative regulation of steroid<br>hormone receptor signaling<br>pathway | 0.0470311 | 0.097313 | 42.27406 | 1  | 2   |

|            |                                                                |           |          |          |    |     |
|------------|----------------------------------------------------------------|-----------|----------|----------|----|-----|
| GO:0033280 | response to vitamin D<br>cellular polysaccharide               | 0.0470311 | 0.097313 | 42.27406 | 1  | 2   |
| GO:0033692 | biosynthetic process                                           | 0.0470311 | 0.097313 | 42.27406 | 1  | 2   |
| GO:0034605 | cellular response to heat                                      | 0.0470311 | 0.097313 | 42.27406 | 1  | 2   |
| GO:0040020 | regulation of meiosis<br>interferon-gamma                      | 0.0470311 | 0.097313 | 42.27406 | 1  | 2   |
| GO:0042095 | biosynthetic process<br>fat-soluble vitamin catabolic          | 0.0470311 | 0.097313 | 42.27406 | 1  | 2   |
| GO:0042363 | process<br>regulation of respiratory                           | 0.0470311 | 0.097313 | 42.27406 | 1  | 2   |
| GO:0043576 | gaseous exchange                                               | 0.0470311 | 0.097313 | 42.27406 | 1  | 2   |
| GO:0043652 | engulfment of apoptotic cell<br>positive regulation of hormone | 0.0470311 | 0.097313 | 42.27406 | 1  | 2   |
| GO:0046887 | secretion<br>ephrin receptor signaling                         | 0.0470311 | 0.097313 | 42.27406 | 1  | 2   |
| GO:0048013 | pathway<br>negative regulation of                              | 0.0470311 | 0.097313 | 42.27406 | 1  | 2   |
| GO:0048147 | fibroblast proliferation<br>mitochondrial iron ion             | 0.0470311 | 0.097313 | 42.27406 | 1  | 2   |
| GO:0048250 | transport                                                      | 0.0470311 | 0.097313 | 42.27406 | 1  | 2   |
| GO:0048278 | vesicle docking                                                | 0.0470311 | 0.097313 | 42.27406 | 1  | 2   |
| GO:0050790 | regulation of catalytic activity                               | 0.0470311 | 0.097313 | 42.27406 | 1  | 2   |
| GO:0050893 | sensory processing                                             | 0.0470311 | 0.097313 | 42.27406 | 1  | 2   |
| GO:0051541 | elastin metabolic process<br>convergent extension involved     | 0.0470311 | 0.097313 | 42.27406 | 1  | 2   |
| GO:0060027 | in gastrulation                                                | 0.0470311 | 0.097313 | 42.27406 | 1  | 2   |
| GO:0007596 | blood coagulation                                              | 0.0475936 | 0.097521 | 3.085698 | 5  | 137 |
| GO:0042742 | defense response to bacterium<br>interspecies interaction      | 0.0475936 | 0.097521 | 3.085698 | 5  | 137 |
| GO:0044419 | between organisms                                              | 0.0497488 | 0.09894  | 2.067191 | 10 | 409 |
| GO:0016049 | cell growth                                                    | 0.0498017 | 0.098974 | 4.785742 | 3  | 53  |

### genes down-regulated

|            |                                                             |           |          |          |   |     |
|------------|-------------------------------------------------------------|-----------|----------|----------|---|-----|
| GO:0006955 | immune response                                             | 0.0058487 | 0.304351 | 0.203976 | 2 | 829 |
| GO:0007243 | protein kinase cascade                                      | 0.0062391 | 0.304351 | 4.227406 | 6 | 120 |
| GO:0006412 | translation                                                 | 0.0159007 | 0.304351 | 0.146531 | 1 | 577 |
| GO:0009605 | response to external stimulus<br>nuclear mRNA splicing, via | 0.0199775 | 0.304351 | 13.0074  | 2 | 13  |
| GO:0000398 | spliceosome                                                 | 0.0217931 | 0.304351 | 2.915452 | 7 | 203 |
| GO:0008037 | cell recognition<br>endodermal cell fate                    | 0.023126  | 0.304351 | 12.0783  | 2 | 14  |
| GO:0001711 | commitment                                                  | 0.0236552 | 0.304351 | 84.54812 | 1 | 1   |
| GO:0007035 | vacuolar acidification                                      | 0.0236552 | 0.304351 | 84.54812 | 1 | 1   |
| GO:0014010 | Schwann cell proliferation                                  | 0.0236552 | 0.304351 | 84.54812 | 1 | 1   |

|            |                                                                      |           |          |          |   |     |
|------------|----------------------------------------------------------------------|-----------|----------|----------|---|-----|
| GO:0030858 | positive regulation of epithelial cell differentiation               | 0.0236552 | 0.304351 | 84.54812 | 1 | 1   |
| GO:0032354 | response to follicle-stimulating hormone stimulus                    | 0.0236552 | 0.304351 | 84.54812 | 1 | 1   |
| GO:0034695 | response to prostaglandin E stimulus                                 | 0.0236552 | 0.304351 | 84.54812 | 1 | 1   |
| GO:0034699 | response to luteinizing hormone stimulus                             | 0.0236552 | 0.304351 | 84.54812 | 1 | 1   |
| GO:0042375 | quinone cofactor metabolic process                                   | 0.0236552 | 0.304351 | 84.54812 | 1 | 1   |
| GO:0042524 | negative regulation of tyrosine phosphorylation of Stat5 protein     | 0.0236552 | 0.304351 | 84.54812 | 1 | 1   |
| GO:0046108 | uridine metabolic process                                            | 0.0236552 | 0.304351 | 84.54812 | 1 | 1   |
| GO:0046164 | alcohol catabolic process                                            | 0.0236552 | 0.304351 | 84.54812 | 1 | 1   |
| GO:0046777 | protein amino acid autophosphorylation                               | 0.0253961 | 0.304351 | 4.449901 | 4 | 76  |
| GO:0018105 | peptidyl-serine phosphorylation                                      | 0.0417997 | 0.330225 | 8.899802 | 2 | 19  |
| GO:0050896 | response to stimulus                                                 | 0.0421645 | 0.330602 | 0.336398 | 3 | 754 |
| GO:0000904 | cell morphogenesis involved in differentiation                       | 0.0470311 | 0.335132 | 42.27406 | 1 | 2   |
| GO:0006043 | glucosamine catabolic process                                        | 0.0470311 | 0.335132 | 42.27406 | 1 | 2   |
| GO:0006664 | glycolipid metabolic process                                         | 0.0470311 | 0.335132 | 42.27406 | 1 | 2   |
| GO:0018343 | protein farnesylation                                                | 0.0470311 | 0.335132 | 42.27406 | 1 | 2   |
| GO:0031574 | S-M checkpoint                                                       | 0.0470311 | 0.335132 | 42.27406 | 1 | 2   |
| GO:0032331 | negative regulation of chondrocyte differentiation                   | 0.0470311 | 0.335132 | 42.27406 | 1 | 2   |
| GO:0033595 | response to genistein                                                | 0.0470311 | 0.335132 | 42.27406 | 1 | 2   |
| GO:0033600 | negative regulation of mammary gland epithelial cell proliferation   | 0.0470311 | 0.335132 | 42.27406 | 1 | 2   |
| GO:0035067 | negative regulation of histone acetylation                           | 0.0470311 | 0.335132 | 42.27406 | 1 | 2   |
| GO:0043009 | chordate embryonic development                                       | 0.0470311 | 0.335132 | 42.27406 | 1 | 2   |
| GO:0048178 | negative regulation of hepatocyte growth factor biosynthetic process | 0.0470311 | 0.335132 | 42.27406 | 1 | 2   |
| GO:0050794 | regulation of cellular process                                       | 0.0470311 | 0.335132 | 42.27406 | 1 | 2   |
| GO:0050999 | regulation of nitric-oxide synthase activity                         | 0.0470311 | 0.335132 | 42.27406 | 1 | 2   |

**Supplemental table 4.** The dysregulated genes in the dysregulated pathways identified by the microarray.

| <b>path_id</b> | <b>path_name</b>      |    | <b>gene_name</b> | <b>pvalue</b> | <b>FDR</b> | <b>enrichment</b> |
|----------------|-----------------------|----|------------------|---------------|------------|-------------------|
| 4142           | Lysosome              | UP | GM2A             | 2.082E-10     | 2.011E-08  | 10.292814         |
| 4142           | Lysosome              | UP | NAPA             | 2.082E-10     | 2.011E-08  | 10.292814         |
| 4142           | Lysosome              | UP | ASAH1            | 2.082E-10     | 2.011E-08  | 10.292814         |
| 4142           | Lysosome              | UP | GALC             | 2.082E-10     | 2.011E-08  | 10.292814         |
| 4142           | Lysosome              | UP | LIPA             | 2.082E-10     | 2.011E-08  | 10.292814         |
| 4142           | Lysosome              | UP | PSAP             | 2.082E-10     | 2.011E-08  | 10.292814         |
| 4142           | Lysosome              | UP | FUCA1            | 2.082E-10     | 2.011E-08  | 10.292814         |
| 4142           | Lysosome              | UP | LAPTM4B          | 2.082E-10     | 2.011E-08  | 10.292814         |
| 4142           | Lysosome              | UP | CTSD             | 2.082E-10     | 2.011E-08  | 10.292814         |
| 4142           | Lysosome              | UP | CTSB             | 2.082E-10     | 2.011E-08  | 10.292814         |
| 4142           | Lysosome              | UP | AP1M1            | 2.082E-10     | 2.011E-08  | 10.292814         |
| 4142           | Lysosome              | UP | IDS              | 2.082E-10     | 2.011E-08  | 10.292814         |
| 4142           | Lysosome              | UP | HGSNAT           | 2.082E-10     | 2.011E-08  | 10.292814         |
| 4142           | Lysosome              | UP | NPC1             | 2.082E-10     | 2.011E-08  | 10.292814         |
| 4510           | Focal adhesion        | UP | CAV2             | 0.0003225     | 0.0067901  | 4.1855504         |
| 4510           | Focal adhesion        | UP | PTK2             | 0.0003225     | 0.0067901  | 4.1855504         |
| 4510           | Focal adhesion        | UP | PAK2             | 0.0003225     | 0.0067901  | 4.1855504         |
| 4510           | Focal adhesion        | UP | SHC1             | 0.0003225     | 0.0067901  | 4.1855504         |
| 4510           | Focal adhesion        | UP | LAMB3            | 0.0003225     | 0.0067901  | 4.1855504         |
| 4510           | Focal adhesion        | UP | MAPK1            | 0.0003225     | 0.0067901  | 4.1855504         |
| 4510           | Focal adhesion        | UP | THBS1            | 0.0003225     | 0.0067901  | 4.1855504         |
| 4510           | Focal adhesion        | UP | CDKN1A           | 0.0003225     | 0.0067901  | 4.1855504         |
| 4510           | Focal adhesion        | UP | LAMA3            | 0.0003225     | 0.0067901  | 4.1855504         |
| 4510           | Focal adhesion        | UP | LAMA5            | 0.0003225     | 0.0067901  | 4.1855504         |
| 4115           | p53 signaling pathway | UP | CCNG2            | 0.0003388     | 0.0069028  | 7.3520102         |
| 4115           | p53 signaling pathway | UP | FAS              | 0.0003388     | 0.0069028  | 7.3520102         |
| 4115           | p53 signaling pathway | UP | SERPINB5         | 0.0003388     | 0.0069028  | 7.3520102         |
| 4115           | p53 signaling pathway | UP | SFN              | 0.0003388     | 0.0069028  | 7.3520102         |
| 4115           | p53 signaling pathway | UP | THBS1            | 0.0003388     | 0.0069028  | 7.3520102         |
| 4115           | p53 signaling pathway | UP | CDKN1A           | 0.0003388     | 0.0069028  | 7.3520102         |
| 5200           | Pathways in cancer    | UP | FAS              | 0.0003662     | 0.0070753  | 3.3206209         |
| 5200           | Pathways in cancer    | UP | PTK2             | 0.0003662     | 0.0070753  | 3.3206209         |
| 5200           | Pathways in cancer    | UP | TRAF4            | 0.0003662     | 0.0070753  | 3.3206209         |
| 5200           | Pathways in cancer    | UP | LAMB3            | 0.0003662     | 0.0070753  | 3.3206209         |
| 5200           | Pathways in cancer    | UP | CDKN1A           | 0.0003662     | 0.0070753  | 3.3206209         |
| 5200           | Pathways in cancer    | UP | TGFBR2           | 0.0003662     | 0.0070753  | 3.3206209         |
| 5200           | Pathways in cancer    | UP | FZD6             | 0.0003662     | 0.0070753  | 3.3206209         |
| 5200           | Pathways in cancer    | UP | SMAD3            | 0.0003662     | 0.0070753  | 3.3206209         |
| 5200           | Pathways in cancer    | UP | MAPK1            | 0.0003662     | 0.0070753  | 3.3206209         |

|      |                                                |    |        |           |           |           |
|------|------------------------------------------------|----|--------|-----------|-----------|-----------|
| 5200 | Pathways in cancer                             | UP | LAMA3  | 0.0003662 | 0.0070753 | 3.3206209 |
| 5200 | Pathways in cancer                             | UP | LAMA5  | 0.0003662 | 0.0070753 | 3.3206209 |
| 5200 | Pathways in cancer                             | UP | IKBKB  | 0.0003662 | 0.0070753 | 3.3206209 |
| 5200 | Pathways in cancer                             | UP | SLC2A1 | 0.0003662 | 0.0070753 | 3.3206209 |
| 5220 | Chronic myeloid leukemia                       | UP | SHC1   | 0.0005362 | 0.0086344 | 6.7638494 |
| 5220 | Chronic myeloid leukemia                       | UP | TGFBR2 | 0.0005362 | 0.0086344 | 6.7638494 |
| 5220 | Chronic myeloid leukemia                       | UP | CDKN1A | 0.0005362 | 0.0086344 | 6.7638494 |
| 5220 | Chronic myeloid leukemia                       | UP | SMAD3  | 0.0005362 | 0.0086344 | 6.7638494 |
| 5220 | Chronic myeloid leukemia                       | UP | MAPK1  | 0.0005362 | 0.0086344 | 6.7638494 |
| 5220 | Chronic myeloid leukemia                       | UP | IKBKB  | 0.0005362 | 0.0086344 | 6.7638494 |
| 250  | Alanine, aspartate and<br>glutamate metabolism | UP | ABAT   | 0.001069  | 0.0132123 | 10.568515 |
| 250  | Alanine, aspartate and<br>glutamate metabolism | UP | ADSSL1 | 0.001069  | 0.0132123 | 10.568515 |
| 250  | Alanine, aspartate and<br>glutamate metabolism | UP | GLS    | 0.001069  | 0.0132123 | 10.568515 |
| 250  | Alanine, aspartate and<br>glutamate metabolism | UP | GFPT1  | 0.001069  | 0.0132123 | 10.568515 |
| 5222 | Small cell lung cancer                         | UP | IKBKB  | 0.0011228 | 0.013559  | 5.8987058 |
| 5222 | Small cell lung cancer                         | UP | PTK2   | 0.0011228 | 0.013559  | 5.8987058 |
| 5222 | Small cell lung cancer                         | UP | TRAF4  | 0.0011228 | 0.013559  | 5.8987058 |
| 5222 | Small cell lung cancer                         | UP | LAMB3  | 0.0011228 | 0.013559  | 5.8987058 |
| 5222 | Small cell lung cancer                         | UP | LAMA3  | 0.0011228 | 0.013559  | 5.8987058 |
| 5222 | Small cell lung cancer                         | UP | LAMA5  | 0.0011228 | 0.013559  | 5.8987058 |
| 4360 | Axon guidance                                  | UP | PTK2   | 0.001795  | 0.0192685 | 4.5878823 |
| 4360 | Axon guidance                                  | UP | PAK2   | 0.001795  | 0.0192685 | 4.5878823 |
| 4360 | Axon guidance                                  | UP | RHOD   | 0.001795  | 0.0192685 | 4.5878823 |
| 4360 | Axon guidance                                  | UP | MAPK1  | 0.001795  | 0.0192685 | 4.5878823 |
| 4360 | Axon guidance                                  | UP | CDKN1A | 0.001795  | 0.0192685 | 4.5878823 |
| 4360 | Axon guidance                                  | UP | EPHA2  | 0.001795  | 0.0192685 | 4.5878823 |
| 4360 | Axon guidance                                  | UP | PLXNB2 | 0.001795  | 0.0192685 | 4.5878823 |
| 4512 | ECM-receptor interaction                       | UP | CD44   | 0.0065072 | 0.0540683 | 5.032626  |
| 4512 | ECM-receptor interaction                       | UP | LAMB3  | 0.0065072 | 0.0540683 | 5.032626  |
| 4512 | ECM-receptor interaction                       | UP | THBS1  | 0.0065072 | 0.0540683 | 5.032626  |
| 4512 | ECM-receptor interaction                       | UP | LAMA3  | 0.0065072 | 0.0540683 | 5.032626  |
| 4512 | ECM-receptor interaction                       | UP | LAMA5  | 0.0065072 | 0.0540683 | 5.032626  |
| 4012 | ErbB signaling pathway                         | UP | PTK2   | 0.0075676 | 0.0598371 | 4.8590872 |
| 4012 | ErbB signaling pathway                         | UP | PAK2   | 0.0075676 | 0.0598371 | 4.8590872 |
| 4012 | ErbB signaling pathway                         | UP | SHC1   | 0.0075676 | 0.0598371 | 4.8590872 |
| 4012 | ErbB signaling pathway                         | UP | MAPK1  | 0.0075676 | 0.0598371 | 4.8590872 |
| 4012 | ErbB signaling pathway                         | UP | CDKN1A | 0.0075676 | 0.0598371 | 4.8590872 |
| 4350 | TGF-beta signaling pathway                     | UP | TFDP1  | 0.0075676 | 0.0598371 | 4.8590872 |
| 4350 | TGF-beta signaling pathway                     | UP | MAPK1  | 0.0075676 | 0.0598371 | 4.8590872 |
| 4350 | TGF-beta signaling pathway                     | UP | THBS1  | 0.0075676 | 0.0598371 | 4.8590872 |

|      |                                           |    |           |           |           |           |
|------|-------------------------------------------|----|-----------|-----------|-----------|-----------|
| 4350 | TGF-beta signaling pathway                | UP | TGFBR2    | 0.0075676 | 0.0598371 | 4.8590872 |
| 4350 | TGF-beta signaling pathway                | UP | SMAD3     | 0.0075676 | 0.0598371 | 4.8590872 |
| 4650 | Natural killer cell mediated cytotoxicity | UP | FAS       | 0.0118843 | 0.0785058 | 3.7028372 |
| 4650 | Natural killer cell mediated cytotoxicity | UP | TNFRSF10D | 0.0118843 | 0.0785058 | 3.7028372 |
| 4650 | Natural killer cell mediated cytotoxicity | UP | SHC1      | 0.0118843 | 0.0785058 | 3.7028372 |
| 4650 | Natural killer cell mediated cytotoxicity | UP | IFNGR1    | 0.0118843 | 0.0785058 | 3.7028372 |
| 4650 | Natural killer cell mediated cytotoxicity | UP | MAPK1     | 0.0118843 | 0.0785058 | 3.7028372 |
| 4650 | Natural killer cell mediated cytotoxicity | UP | MICA      | 0.0118843 | 0.0785058 | 3.7028372 |
| 4910 | Insulin signaling pathway                 | UP | PHKB      | 0.0123036 | 0.0799972 | 3.6760051 |
| 4910 | Insulin signaling pathway                 | UP | FAS       | 0.0123036 | 0.0799972 | 3.6760051 |
| 4910 | Insulin signaling pathway                 | UP | SHC1      | 0.0123036 | 0.0799972 | 3.6760051 |
| 4910 | Insulin signaling pathway                 | UP | EXOC7     | 0.0123036 | 0.0799972 | 3.6760051 |
| 4910 | Insulin signaling pathway                 | UP | MAPK1     | 0.0123036 | 0.0799972 | 3.6760051 |
| 4910 | Insulin signaling pathway                 | UP | IKBKB     | 0.0123036 | 0.0799972 | 3.6760051 |
|      | Glycolysis                                | /  |           |           |           |           |
| 10   | Gluconeogenesis                           | UP | PGM1      | 0.0125572 | 0.0808765 | 5.4547172 |
|      | Glycolysis                                | /  |           |           |           |           |
| 10   | Gluconeogenesis                           | UP | ALDH1A3   | 0.0125572 | 0.0808765 | 5.4547172 |
|      | Glycolysis                                | /  |           |           |           |           |
| 10   | Gluconeogenesis                           | UP | PKM2      | 0.0125572 | 0.0808765 | 5.4547172 |
|      | Glycolysis                                | /  |           |           |           |           |
| 10   | Gluconeogenesis                           | UP | ADH5      | 0.0125572 | 0.0808765 | 5.4547172 |
| 5211 | Renal cell carcinoma                      | UP | PAK2      | 0.0191758 | 0.1075182 | 4.831321  |
| 5211 | Renal cell carcinoma                      | UP | CDKN1A    | 0.0191758 | 0.1075182 | 4.831321  |
| 5211 | Renal cell carcinoma                      | UP | MAPK1     | 0.0191758 | 0.1075182 | 4.831321  |
| 5211 | Renal cell carcinoma                      | UP | SLC2A1    | 0.0191758 | 0.1075182 | 4.831321  |
| 5212 | Pancreatic cancer                         | UP | TGFBR2    | 0.0211248 | 0.1140971 | 4.6971176 |
| 5212 | Pancreatic cancer                         | UP | SMAD3     | 0.0211248 | 0.1140971 | 4.6971176 |
| 5212 | Pancreatic cancer                         | UP | MAPK1     | 0.0211248 | 0.1140971 | 4.6971176 |
| 5212 | Pancreatic cancer                         | UP | IKBKB     | 0.0211248 | 0.1140971 | 4.6971176 |
| 4520 | Adherens junction                         | UP | CTNND1    | 0.0265436 | 0.1300853 | 4.39211   |
| 4520 | Adherens junction                         | UP | TGFBR2    | 0.0265436 | 0.1300853 | 4.39211   |
| 4520 | Adherens junction                         | UP | MAPK1     | 0.0265436 | 0.1300853 | 4.39211   |
| 4520 | Adherens junction                         | UP | SMAD3     | 0.0265436 | 0.1300853 | 4.39211   |
| 5219 | Bladder cancer                            | UP | THBS1     | 0.0268329 | 0.1308561 | 6.0391512 |
| 5219 | Bladder cancer                            | UP | CDKN1A    | 0.0268329 | 0.1308561 | 6.0391512 |
| 5219 | Bladder cancer                            | UP | MAPK1     | 0.0268329 | 0.1308561 | 6.0391512 |
| 520  | Amino sugar and                           | UP | PGM1      | 0.028597  | 0.1353963 | 5.8987058 |



|      |                             |      |        |           |           |           |
|------|-----------------------------|------|--------|-----------|-----------|-----------|
|      | nucleotide sugar metabolism |      |        |           |           |           |
|      | Amino sugar and             |      |        |           |           |           |
| 520  | nucleotide sugar metabolism | UP   | PMM2   | 0.028597  | 0.1353963 | 5.8987058 |
|      | Amino sugar and             |      |        |           |           |           |
| 520  | nucleotide sugar metabolism | UP   | GFPT1  | 0.028597  | 0.1353963 | 5.8987058 |
| 100  | Steroid biosynthesis        | UP   | SC4MOL | 0.0337644 | 0.1472928 | 9.9468373 |
| 100  | Steroid biosynthesis        | UP   | LIPA   | 0.0337644 | 0.1472928 | 9.9468373 |
| 5210 | Colorectal cancer           | UP   | TGFBR2 | 0.0355015 | 0.1508826 | 4.0261008 |
| 5210 | Colorectal cancer           | UP   | FZD6   | 0.0355015 | 0.1508826 | 4.0261008 |
| 5210 | Colorectal cancer           | UP   | SMAD3  | 0.0355015 | 0.1508826 | 4.0261008 |
| 5210 | Colorectal cancer           | UP   | MAPK1  | 0.0355015 | 0.1508826 | 4.0261008 |
| 4930 | Type II diabetes mellitus   | UP   | PKM2   | 0.0362985 | 0.1524686 | 5.3966883 |
| 4930 | Type II diabetes mellitus   | UP   | MAPK1  | 0.0362985 | 0.1524686 | 5.3966883 |
| 4930 | Type II diabetes mellitus   | UP   | IKKB   | 0.0362985 | 0.1524686 | 5.3966883 |
|      | Glycosaminoglycan           |      |        |           |           |           |
| 531  | degradation                 | UP   | HGSNAT | 0.0417997 | 0.1682604 | 8.8998018 |
|      | Glycosaminoglycan           |      |        |           |           |           |
| 531  | degradation                 | UP   | IDS    | 0.0417997 | 0.1682604 | 8.8998018 |
| 4520 | Adherens junction           | DOWN | FGFR1  | 0.000619  | 0.0547099 | 6.588165  |
| 4520 | Adherens junction           | DOWN | NLK    | 0.000619  | 0.0547099 | 6.588165  |
| 4520 | Adherens junction           | DOWN | ACTB   | 0.000619  | 0.0547099 | 6.588165  |
| 4520 | Adherens junction           | DOWN | CTNNB1 | 0.000619  | 0.0547099 | 6.588165  |
| 4520 | Adherens junction           | DOWN | RHOA   | 0.000619  | 0.0547099 | 6.588165  |
| 4520 | Adherens junction           | DOWN | EGFR   | 0.000619  | 0.0547099 | 6.588165  |
|      | Pathogenic Escherichia coli |      |        |           |           |           |
| 5130 | infection - EHEC            | DOWN | TUBA3C | 0.0008153 | 0.0708265 | 7.9762375 |
|      | Pathogenic Escherichia coli |      |        |           |           |           |
| 5130 | infection - EHEC            | DOWN | TUBB2A | 0.0008153 | 0.0708265 | 7.9762375 |
|      | Pathogenic Escherichia coli |      |        |           |           |           |
| 5130 | infection - EHEC            | DOWN | ACTB   | 0.0008153 | 0.0708265 | 7.9762375 |
|      | Pathogenic Escherichia coli |      |        |           |           |           |
| 5130 | infection - EHEC            | DOWN | CTNNB1 | 0.0008153 | 0.0708265 | 7.9762375 |
|      | Pathogenic Escherichia coli |      |        |           |           |           |
| 5130 | infection - EHEC            | DOWN | RHOA   | 0.0008153 | 0.0708265 | 7.9762375 |
| 4530 | Tight junction              | DOWN | VAPA   | 0.0106887 | 0.4998421 | 3.7857366 |
| 4530 | Tight junction              | DOWN | ACTB   | 0.0106887 | 0.4998421 | 3.7857366 |
| 4530 | Tight junction              | DOWN | CASK   | 0.0106887 | 0.4998421 | 3.7857366 |
|      |                             |      |        |           |           |           |
| 4520 | Adherens junction           | DOWN | FGFR1  | 0.000619  | 0.0547099 | 6.588165  |
| 4520 | Adherens junction           | DOWN | NLK    | 0.000619  | 0.0547099 | 6.588165  |
| 4520 | Adherens junction           | DOWN | ACTB   | 0.000619  | 0.0547099 | 6.588165  |
| 4520 | Adherens junction           | DOWN | CTNNB1 | 0.000619  | 0.0547099 | 6.588165  |
| 4520 | Adherens junction           | DOWN | RHOA   | 0.000619  | 0.0547099 | 6.588165  |
| 4520 | Adherens junction           | DOWN | EGFR   | 0.000619  | 0.0547099 | 6.588165  |

|      |                             |      |        |           |           |           |
|------|-----------------------------|------|--------|-----------|-----------|-----------|
|      | Pathogenic Escherichia coli |      |        |           |           |           |
| 5130 | infection - EHEC            | DOWN | TUBA3C | 0.0008153 | 0.0708265 | 7.9762375 |
|      | Pathogenic Escherichia coli |      |        |           |           |           |
| 5130 | infection - EHEC            | DOWN | TUBB2A | 0.0008153 | 0.0708265 | 7.9762375 |
|      | Pathogenic Escherichia coli |      |        |           |           |           |
| 5130 | infection - EHEC            | DOWN | ACTB   | 0.0008153 | 0.0708265 | 7.9762375 |
|      | Pathogenic Escherichia coli |      |        |           |           |           |
| 5130 | infection - EHEC            | DOWN | CTNNB1 | 0.0008153 | 0.0708265 | 7.9762375 |
|      | Pathogenic Escherichia coli |      |        |           |           |           |
| 5130 | infection - EHEC            | DOWN | RHOA   | 0.0008153 | 0.0708265 | 7.9762375 |
| 4530 | Tight junction              | DOWN | VAPA   | 0.0106887 | 0.4998421 | 3.7857366 |
| 4530 | Tight junction              | DOWN | ACTB   | 0.0106887 | 0.4998421 | 3.7857366 |
| 4530 | Tight junction              | DOWN | CASK   | 0.0106887 | 0.4998421 | 3.7857366 |
| 4530 | Tight junction              | DOWN | MYH10  | 0.0106887 | 0.4998421 | 3.7857366 |
| 4530 | Tight junction              | DOWN | CTNNB1 | 0.0106887 | 0.4998421 | 3.7857366 |
| 4530 | Tight junction              | DOWN | RHOA   | 0.0106887 | 0.4998421 | 3.7857366 |

---

**Supplemental table 5** The basic clinic parameters of patients enrolled in this study

| Case number | ID of inpatient | Gender | Age(years) | Date of surgery | Diagnosis of histopathology | Tumor size  | Distant metastasis | T  | N  | M  | AJCC clinical stage | History of diabetes |
|-------------|-----------------|--------|------------|-----------------|-----------------------------|-------------|--------------------|----|----|----|---------------------|---------------------|
| 505         | 1005292078      | Male   | 53         | 10-May-16       | PDAC                        | 1.5×1×1cm   | No                 | T3 | N0 | M0 | 2A                  | YES                 |
| no          | 1005122842      | Male   | 61         | 17-May-16       | PDAC                        | 9×6×6cm     | No                 | T3 | N0 | M1 | 4                   | YES                 |
| 524         | 1005566398      | Male   | 49         | 10-Jun-16       | PDAC                        | 5×3×2cm     | No                 | T2 | N1 | M0 | 2B                  | unknown             |
| 534         | 1005475368      | Female | 64         | 8-Jul-16        | PDAC                        | 4×4×2cm     | No                 | T2 | N0 | M0 | 1B                  | YES                 |
| 538         | 1001614445      | Female | 74         | 19-Jul-16       | PDAC                        | 8×5×3cm     | No                 | T3 | N0 | M0 | 2A                  | unknown             |
| 548         | 1005759755      | Female | 64         | 8-Aug-16        | PDAC                        | 10×5×4cm    | No                 | T2 | N0 | M0 | 1B                  | YES                 |
| 653         | 1004908044      | Male   | 60         | 13-Mar-17       | PDAC                        | 3×3×2.5cm   | No                 | T2 | N1 | M0 | 2B                  | YES                 |
| 654         | 1006147126      | Male   | 38         | 14-Mar-17       | PDAC                        | 6.5×4×3.5cm | No                 | T2 | N1 | M0 | 2B                  | unknown             |
| 696         | 1006554313      | Male   | 49         | 13-Jun-17       | PDAC                        | 7×5×3cm     | No                 | T3 |    | M0 | 2                   | YES                 |
| 706         | 1006872878      | Female | 75         | 25-Jul-17       | PDAC                        | 4×4×3cm     | No                 | T3 | N0 | M1 | 4                   | unknown             |
| 727         | 1006763952      | Male   | 73         | 29-Sep-17       | PDAC                        | 7×4×3cm     | No                 | T2 |    | M0 | 2A                  | YES                 |
